# Supplementary material
Source: HighWire-hosted journal article supplement (https://bmjopen.bmj.com/content/9/7/e028939)
Supplement: inline-supplementary-material-1 [file inline-supplementary-material-1.pdf]

**Table S1:** Age-adjusted predicted changes in means and prevalences of cardiovascular risk factors between the SAMINOR 1 (2003–2004) and SAMINOR 2 (2012–2014) in women (n=6624), stratified into three groups according to responses to ethnicity related questions.

| Linear regression               | Non-Sami (n=3262)    |         | Sami in all items (n=1453) |         | Sami in 1–10 items (n=1909) |         | Interaction*   |         |
|---------------------------------|----------------------|---------|----------------------------|---------|-----------------------------|---------|----------------|---------|
|                                 | $\beta$ (95% CI)     | p-value | $\beta$ (95% CI)           | p-value | $\beta$ (95% CI)            | p-value |                | p-value |
| Cholesterol, mmol/L             | -0.55 (-0.61, -0.48) | <0.001  | -0.44 (-0.55, -0.33)       | <0.001  | -0.46 (-0.55, -0.37)        | <0.001  | *              |         |
| SAMINOR 1, mean †               | 6.27 (6.21, 6.33)    |         | 6.23 (6.13, 6.34)          |         | 6.21 (6.12, 6.29)           |         |                |         |
| SAMINOR 2, mean †               | 5.72 (5.66, 5.79)    |         | 5.79 (5.70, 5.89)          |         | 5.75 (5.66, 5.83)           |         |                |         |
| HDL cholesterol, mmol/L         | 0.04 (0.02, 0.07)    | <0.001  | -0.03 (-0.06, -0.005)      | 0.02    | 0.03 (-0.002, 0.05)         | 0.07    | Sami all items | <0.001  |
| SAMINOR 1, mean †               | 1.53 (1.51, 1.55)    |         | 1.47 (1.43, 1.50)          |         | 1.46 (1.43, 1.49)           |         |                |         |
| SAMINOR 2, mean †               | 1.58 (1.55, 1.60)    |         | 1.43 (1.40, 1.46)          |         | 1.48 (1.45, 1.51)           |         |                |         |
| Triglycerides, mmol/L §         | -0.02 (-0.05, 0.004) | 0.10    | 0.03 (-0.01, 0.07)         | 0.19    | 0.02 (-0.02, 0.05)          | 0.34    | *              |         |
| SAMINOR 1, mean †#              | 2.21 (2.07, 2.34)    |         | 2.47 (2.23, 2.71)          |         | 2.59 (2.37, 2.80)           |         |                |         |
| SAMINOR 2, mean †#              | 2.09 (1.96, 2.23)    |         | 2.63 (2.39, 2.88)          |         | 2.69 (2.47, 2.92)           |         |                |         |
| Systolic blood pressure, mm Hg  | -4.3 (-5.25, -3.13)  | <0.001  | -3.4 (-5.04, -1.83)        | <0.001  | -2.7 (-4.09, -1.23)         | <0.001  | *              |         |
| SAMINOR 1, mean †               | 134.6 (133.7, 135.6) |         | 132.3 (130.7, 133.9)       |         | 133.7 (132.3, 135.1)        |         |                |         |
| SAMINOR 2, mean †               | 130.4 (129.4, 131.5) |         | 128.8 (127.3, 130.4)       |         | 131.1 (129.7, 132.5)        |         |                |         |
| Diastolic blood pressure, mm Hg | -0.9 (-1.47, -0.28)  | 0.004   | -1.4 (-2.26, -0.57)        | 0.001   | -0.8 (-1.60, -0.02)         | 0.044   | *              |         |
| SAMINOR 1, mean †               | 73.9 (73.34, 74.45)  |         | 73.2 (72.38, 74.06)        |         | 73.8 (73.00, 74.53)         |         |                |         |
| SAMINOR 2, mean †               | 73.0 (72.43, 73.62)  |         | 71.8 (71.00, 72.61)        |         | 73.0 (72.19, 73.71)         |         |                |         |
| Waist circumference, cm         | 7.1 (6.53, 7.72)     | <0.001  | 5.9 (4.97, 6.77)           | <0.001  | 6.5 (5.75, 7.29)            | <0.001  | *              |         |
| SAMINOR 1, mean †               | 86.1 (85.48, 86.73)  |         | 88.6 (87.61, 89.59)        |         | 87.3 (86.43, 88.13)         |         |                |         |
| SAMINOR 2, mean †               | 93.2 (92.57, 93.90)  |         | 94.47 (93.52, 95.41)       |         | 93.8 (92.87, 94.63)         |         |                |         |
| 10-year risk of AMI and CS, % § | -0.19 (-0.22, -0.16) | <0.001  | -0.12 (-0.16, -0.07)       | <0.001  | -0.17 (-0.21, -0.12)        | <0.001  | Sami all items | 0.02    |
| SAMINOR 1, mean †#              | 4.09 (3.97, 4.21)    |         | 3.81 (3.63, 3.98)          |         | 4.22 (4.04, 4.40)           |         |                |         |
| SAMINOR 2, mean †#              | 3.37 (3.27, 3.48)    |         | 3.39 (3.24, 3.54)          |         | 3.58 (3.43, 3.73)           |         |                |         |
| Logistic regression             | Odds ratio (95% CI)  | p-value | Odds ratio (95% CI)        | p-value | Odds ratio (95% CI)         | p-value |                | p-value |
| Antihypertensive drugs          | 0.96 (0.83, 1.11)    | 0.61    | 0.98 (0.77, 1.23)          | 0.84    | 0.95 (0.79, 1.14)           | 0.58    | *              |         |
| SAMINOR 1, prevalences % †      | 22.9 (20.82, 24.94)  |         | 20.1 (16.96, 23.33)        |         | 27.2 (24.30, 30.15)         |         |                |         |
| SAMINOR 2, prevalences % †      | 22.2 (19.93, 24.50)  |         | 19.8 (16.60, 22.90)        |         | 26.2 (23.29, 29.16)         |         |                |         |
| Hypertension                    | 0.78 (0.68, 0.90)    | <0.001  | 0.76 (0.61, 0.94)          | 0.010   | 0.77 (0.65, 0.92)           | 0.004   | *              |         |
| SAMINOR 1, prevalences % †      | 46.0 (43.45, 48.62)  |         | 42.9 (38.78, 47.05)        |         | 49.6 (46.06, 53.07)         |         |                |         |
| SAMINOR 2, prevalences % †      | 40.1 (37.29, 42.81)  |         | 36.3 (32.44, 40.20)        |         | 43.2 (39.76, 46.60)         |         |                |         |
| Current smoking                 | 0.61 (0.53, 0.69)    | <0.001  | 0.78 (0.64, 0.94)          | 0.011   | 0.63 (0.54, 0.74)           | <0.001  | *              |         |
| SAMINOR 1, prevalences % †      | 30.3 (28.15, 32.41)  |         | 26.3 (23.02, 29.61)        |         | 30.8 (27.94, 33.75)         |         |                |         |
| SAMINOR 2, prevalences % †      | 20.9 (18.91, 22.85)  |         | 21.7 (18.85, 24.61)        |         | 22.0 (19.50, 24.45)         |         |                |         |

$\beta$  –coefficients are estimated by linear generalised estimating equation regression models and adjusted for age and age<sup>2</sup>. Odds ratios are estimated by logistic generalised estimating equation regression models and adjusted for age. †Predicted means/prevalences at age 57.5 years. §Outcome variables are log-transformed. #Predicted geometric means at age 57.5. \* Testing for interaction between survey and ethnicity using non-Sami as reference. If p-value for interaction <0.05, we have specified which group differed from non-Sami in SAMINOR 2. \* If p-value for interaction between survey and ethnicity is >0.05, please refer to the overall estimation given in Table 3. Sami in all items (11 in total): reported use of Sami language in grandparents, parents and themselves; Sami ethnic background for parents and themselves; Sami as self-perceived ethnicity. Sami in 1–10 items: reported Sami for at least one item and maximum for 10 items. Non-Sami: all others. Total and HDL cholesterol and triglycerides were missing in 18 subjects; systolic and diastolic blood pressure were missing in four subjects; hypertension in three. NORRISK 2 score was missing for 193 subjects. Abbreviations: HDL, high density lipoprotein; CI, confidence intervals; AMI, acute myocardial infarction; CS, cerebral stroke.

**Table S2:** Age-adjusted change in means and prevalences of cardiovascular risk factors between the SAMINOR 1 (2003–2004) and SAMINOR 2 (2012–2014) in men (n=5749), stratified into three categories according to responses to ethnicity related questions.

| Linear regression                          | Non-Sami (n=2678)      |         | Sami in all items (n=1244) |         | Sami in 1–10 items (n=1827) |         | Interaction*   |         |
|--------------------------------------------|------------------------|---------|----------------------------|---------|-----------------------------|---------|----------------|---------|
|                                            | $\beta$ (95% CI)       | p-value | $\beta$ (95% CI)           | p-value | $\beta$ (95% CI)            | p-value |                | p-value |
| Cholesterol, mmol/L                        | -0.6 (-0.69, -0.53)    | <0.001  | -0.4 (-0.50, -0.28)        | <0.001  | -0.5 (-0.61, -0.41)         | <0.001  | Sami all items | 0.023   |
| SAMINOR 1, mean †                          | 5.99 (5.92, 6.05)      |         | 6.01 (5.90, 6.11)          |         | 6.03 (5.94, 6.12)           |         |                |         |
| SAMINOR 2, mean †                          | 5.38 (5.30, 5.45)      |         | 5.61 (5.51, 5.72)          |         | 5.52 (5.43, 5.61)           |         |                |         |
| HDL cholesterol, mmol/L                    | -0.01 (-0.03, 0.011)   | 0.33    | -0.09(-0.12, -0.06)        | <0.001  | -0.03 (-0.05, -0.003)       | 0.03    | Sami all items | 0.001   |
| SAMINOR 1, mean †                          | 1.29 (1.27, 1.31)      |         | 1.29 (1.26, 1.32)          |         | 1.29 (1.27, 1.32)           |         |                |         |
| SAMINOR 2, mean †                          | 1.28 (1.26, 1.30)      |         | 1.20 (1.17, 1.23)          |         | 1.27 (1.24, 1.29)           |         |                |         |
| Triglycerides, mmol/L <sup>§</sup>         | 0.003 (-0.03, 0.04)    | 0.89    | 0.10 (0.05, 0.15)          | <0.001  | 0.03 (-0.02, 0.07)          | 0.22    | Sami all items | 0.005   |
| SAMINOR 1, mean † <sup>#</sup>             | 2.91 (2.71, 3.14)      |         | 2.82 (2.50, 3.14)          |         | 3.04 (2.77, 3.31)           |         |                |         |
| SAMINOR 2, mean † <sup>#</sup>             | 2.94 (2.70, 3.18)      |         | 3.56 (3.17, 3.96)          |         | 3.22 (2.93, 3.53)           |         |                |         |
| Systolic blood pressure, mm Hg             | -2.6 (-3.78, -1.50)    | <0.001  | -3.3 (-5.15, -1.54)        | <0.001  | -3.7 (-5.17, -2.17)         | <0.001  | *              |         |
| SAMINOR 1, mean †                          | 136.8 (135.7, 137.8)   |         | 135.7 (134.0, 137.5)       |         | 138.0 (136.7, 139.4)        |         |                |         |
| SAMINOR 2, mean †                          | 134.1 (133.0, 135.2)   |         | 132.4 (130.7, 134.1)       |         | 134.4 (132.9, 135.8)        |         |                |         |
| Diastolic blood pressure, mm Hg            | -0.3 (-0.99, 0.36)     | 0.36    | -1.2 (-2.19, -0.28)        | 0.011   | -1.0 (-1.88, -0.17)         | 0.019   | *              |         |
| SAMINOR 1, mean †                          | 79.7 (79.13, 80.34)    |         | 79.2 (78.25, 80.04)        |         | 80.3 (79.51, 81.05)         |         |                |         |
| SAMINOR 2, mean †                          | 79.4 (78.75, 80.09)    |         | 77.9 (77.02, 78.80)        |         | 79.3 (78.45, 80.06)         |         |                |         |
| Waist circumference, cm                    | 6.3 (5.62, 6.87)       | <0.001  | 5.9 (5.15, 6.69)           | <0.001  | 5.61 (4.85, 6.38)           | <0.001  | Sami 1–10      | 0.04    |
| SAMINOR 1, mean †                          | 94.9 (94.25, 95.46)    |         | 92.6 (91.78, 93.49)        |         | 93.1 (92.37, 93.89)         |         |                |         |
| SAMINOR 2, mean †                          | 101.1 (100.43, 101.77) |         | 98.6 (97.68, 99.42)        |         | 98.8 (97.96, 99.53)         |         |                |         |
| 10-year risk of AMI and CS, % <sup>§</sup> | -0.18 (-0.21, -0.15)   | <0.001  | -0.15 (-0.20, -0.11)       | <0.001  | -0.19 (-0.23, -0.15)        | <0.001  | *              |         |
| SAMINOR 1, mean † <sup>#</sup>             | 8.65 (8.41, 8.89)      |         | 8.54 (8.16, 8.92)          |         | 9.05 (8.72, 9.39)           |         |                |         |
| SAMINOR 2, mean † <sup>#</sup>             | 7.21 (6.99, 7.43)      |         | 7.34 (7.02, 7.66)          |         | 7.48 (7.19, 7.76)           |         |                |         |
| Logistic regression                        | Odds ratios (95% CI)   | p-value | Odds ratios (95% CI)       | p-value | Odds ratio (95% CI)         | p-value |                | p-value |
| Anti-hypertensive drugs                    | 1.20 (1.03, 1.40)      | 0.022   | 1.15 (0.91, 1.46)          | 0.24    | 1.11 (0.91, 1.35)           | 0.30    | *              |         |
| SAMINOR 1, prevalences % †                 | 21.40 (19.25, 23.55)   |         | 18.43 (15.37, 21.49)       |         | 22.71 (19.99, 25.44)        |         |                |         |
| SAMINOR 2, prevalences % †                 | 24.58 (22.00, 27.16)   |         | 20.66 (17.29, 24.04)       |         | 24.59 (21.57, 27.61)        |         |                |         |
| Hypertension                               | 0.96 (0.83, 1.10)      | 0.51    | 0.87 (0.71, 1.07)          | 0.19    | 0.85 (0.72, 1.02)           | 0.07    | *              |         |
| SAMINOR 1, prevalences % †                 | 50.37 (47.64, 53.09)   |         | 45.39 (41.26, 49.51)       |         | 55.21 (51.87, 58.56)        |         |                |         |
| SAMINOR 2, prevalences % †                 | 49.20 (46.26, 52.14)   |         | 42.02 (37.90, 46.15)       |         | 51.23 (47.75, 54.71)        |         |                |         |
| Current smoking                            | 0.54 (0.46, 0.63)      | <0.001  | 0.58 (0.47, 0.71)          | <0.001  | 0.53 (0.44, 0.63)           | <0.001  | *              |         |
| SAMINOR 1, prevalences % †                 | 29.79 (27.44, 32.14)   |         | 31.65 (28.05, 35.25)       |         | 31.63 (28.70, 34.57)        |         |                |         |
| SAMINOR 2, prevalences % †                 | 18.49 (16.38, 20.60)   |         | 21.02 (17.91, 24.12)       |         | 19.54 (16.98, 22.10)        |         |                |         |

$\beta$ -coefficients are estimated by linear generalised estimating equation regression models and adjusted for age and age<sup>2</sup>. Odds ratios are estimated by logistic generalised estimating equation regression models and adjusted for age. †Predicted means/prevalences at age 58.2 years. §Outcome variables are log-transformed. #Predicted geometric means at age 58.2. \*Testing for interaction between survey and ethnicity using non-Sami in SAMINOR 1 as reference. If p-value for interaction <0.05, we have specified which group differs from non-Sami in SAMINOR 2. \*p-value for interaction between survey and ethnicity >0.05, please refer to the overall estimation given in Table 4. Sami in all items (11 in total): reported use of Sami language in grandparents, parents and themselves; Sami ethnic background for parents and themselves; Sami as self-perceived ethnicity. Sami in 1–10 items: reported Sami for at least one item and maximum for 10 items. Non-Sami: all others. Total and HDL cholesterol were missing in 12 subjects; triglycerides were missing in 13 subjects, systolic and diastolic blood pressure and hypertension was missing in one subject. NORRISK 2 score was missing for 173 subjects. Abbreviations: HDL, high density lipoprotein; CI, confidence intervals; AMI, acute myocardial infarction; CS, cerebral stroke.

**Table S3:** Age- and region adjusted predicted changes in beta coefficients and odds ratios of cardiovascular risk factors between SAMINOR 1 (2002–2004) and the SAMINOR 2 (2012–2017) in women and men, after testing for interaction between survey and ethnicity.

| Linear regression               | Women (n=6624)                 |         | Men (n=5749)                     |         |
|---------------------------------|--------------------------------|---------|----------------------------------|---------|
|                                 | $\beta$ (95% CI)               | p-value | $\beta$ (95% CI)                 | p-value |
| Total cholesterol, mmol/L       | -0.50 (-0.54, -0.45)           | <0.001  | *                                |         |
|                                 | -                              |         | Non-Sami: -0.59 (-0.65, -0.52)   | <0.001  |
|                                 | -                              |         | Sami: -0.43 (-0.51, -0.34)       | <0.001  |
| HDL cholesterol, mmol/L         | *                              |         | *                                |         |
|                                 | Non-Sami: 0.05 (0.03, 0.07)    | <0.001  | Non-Sami: -0.01 (-0.03, 0.01)    | 0.31    |
|                                 | Sami: -0.01 (-0.04, 0.01)      | 0.24    | Sami: -0.06 (-0.08, -0.03)       | <0.001  |
| Triglycerides, mmol/L †         | -0.001 (-0.02, 0.02)           | 0.96    | *                                |         |
|                                 | -                              |         | Non-Sami: -0.0002 (-0.03, 0.003) | 0.99    |
|                                 | -                              |         | Sami: 0.09 (0.05, 0.12)          | <0.001  |
| Systolic blood pressure, mm Hg  | -3.5 (-4.25, -2.77)            | <0.001  | -3.0 (-3.81, -2.21)              | <0.001  |
| Diastolic blood pressure, mm Hg | -1.0 (-1.37, -0.55)            | <0.001  | -0.8 (-1.22, -0.30)              | 0.001   |
| Waist circumference, cm         | 6.6 (6.20, 7.03)               | <0.001  | 5.9 (5.52, 6.33)                 | <0.001  |
| 10-year risk of AMI and CS, % † | *                              |         | -0.18 (-0.20, -0.16)             | <0.001  |
|                                 | Non-Sami: -0.19 (-0.22, -0.17) | <0.001  | -                                |         |
|                                 | Sami: -0.12 (-0.16, -0.09)     | <0.001  | -                                |         |
| Logistic regression             | Odds ratio (95% CI)            | p-value | Odds ratio (95% CI)              | p-value |
| Use of anti-hypertensive drugs  | 0.98 (0.89, 1.08)              | 0.68    | 1.20 (1.08, 1.33)                | 0.001   |
| Hypertensive                    | 0.79 (0.72, 0.87)              | <0.001  | 0.93 (0.84, 1.02)                | 0.13    |
| Current smoking                 | 0.64 (0.59, 0.70)              | <0.001  | 0.53 (0.48, 0.59)                | <0.001  |

$\beta$ -coefficients are estimated by linear generalised estimating equation regression models and adjusted for age, age<sup>2</sup> and region. Odds ratios are estimates by logistic generalised estimating equation regression models and adjusted for age and regions. Adjusting for three regions including the following municipalities: 1) Kautokeino and Karasjok. 2) Nesseby, Tana and Porsanger. 3) Kåffjord, Lyngen, Storfjord, Skånland and Evenes. When p-value for interaction between survey and ethnicity is >0.05, overall  $\beta$ -coefficients and odds ratios adjusted for region are reported, otherwise (indicated by \*), ethnic specific  $\beta$ -coefficients are reported. †Outcome variables are log transformed.
